# Supplementary material for: miR-18a-5p derived from mesenchymal stem cells-extracellular vesicles inhibits ovarian cancer cell proliferation, migration, invasion, and chemotherapy resistance
Source: J Transl Med. 2022 Jun 7;20:258. doi: 10.1186/s12967-022-03422-7 (PMC9172103; doi:10.1186/s12967-022-03422-7)
Supplement: Supplementary file 1 — Additional file 1: Table S1. miRNAs expressed in hMSC-EVs were identified through the EVmiRNA database. [file 12967_2022_3422_MOESM1_ESM.xlsx]

## Sheet: Sheet1
#	miRNA ID	Average Expr.	Expression histogram
1	hsa-miR-486-5p	11795.5
2	hsa-miR-92a-3p	5695.56
3	hsa-miR-182-5p	3656.1
4	hsa-miR-146b-5p	3359.04
5	hsa-miR-191-5p	3179.38
6	hsa-miR-10a-5p	1243.95
7	hsa-miR-127-3p	928.68
8	hsa-miR-126-5p	896.88
9	hsa-miR-183-5p	606.74
10	hsa-miR-378a-3p	410.06
11	hsa-miR-186-5p	364.07
12	hsa-miR-99b-5p	357.03
13	hsa-miR-22-3p	323.64
14	hsa-miR-25-3p	291.11
15	hsa-miR-151a-3p	262.95
16	hsa-miR-30d-5p	245.34
17	hsa-miR-26a-5p	241.46
18	hsa-miR-21-5p	189.01
19	hsa-miR-16-5p	182.46
20	hsa-miR-92b-3p	181
21	hsa-miR-30e-5p	180.27
22	hsa-miR-423-5p	176.15
23	hsa-miR-941	157.21
24	hsa-miR-142-5p	137.79
25	hsa-miR-27b-3p	130.26
26	hsa-miR-181a-5p	123.1
27	hsa-miR-192-5p	114.96
28	hsa-miR-381-3p	106.34
29	hsa-let-7a-5p	99.73
30	hsa-miR-4461	93.72
31	hsa-miR-151a-5p	93.35
32	hsa-miR-130b-3p	92.75
33	hsa-miR-423-3p	92.02
34	hsa-miR-411-5p	92.02
35	hsa-miR-20a-5p	89.47
36	hsa-miR-17-5p	81.82
37	hsa-miR-125a-5p	80.85
38	hsa-miR-654-3p	75.02
39	hsa-miR-409-3p	67.38
40	hsa-let-7f-5p	66.89
41	hsa-miR-3180-3p	61.01
42	hsa-miR-126-3p	57.06
43	hsa-miR-93-5p	56.21
44	hsa-miR-19b-3p	54.14
45	hsa-miR-148b-3p	52.81
46	hsa-miR-103a-3p	45.77
47	hsa-miR-30c-5p	43.22
48	hsa-miR-148a-3p	40.79
49	hsa-miR-10b-5p	37.15
50	hsa-miR-425-5p	30.96
51	hsa-miR-140-3p	29.14
52	hsa-miR-26b-5p	28.16
53	hsa-miR-21-3p	23.92
54	hsa-miR-320a	23.21
55	hsa-miR-451a	23.19
56	hsa-miR-500a-3p	20.7
57	hsa-miR-19a-3p	20.15
58	hsa-miR-136-3p	19.91
59	hsa-miR-224-5p	19.79
60	hsa-miR-30b-5p	18.21
61	hsa-miR-99a-5p	17.72
62	hsa-miR-30e-3p	17.48
63	hsa-miR-3180	17.04
64	hsa-miR-589-5p	16.87
65	hsa-miR-223-3p	16.39
66	hsa-miR-769-5p	16.27
67	hsa-miR-197-3p	15.3
68	hsa-miR-4449	15.3
69	hsa-miR-125b-2-3p	15.17
70	hsa-miR-27a-3p	15.05
71	hsa-miR-501-3p	13.96
72	hsa-miR-577	13.6
73	hsa-let-7e-5p	13.2
74	hsa-miR-18a-5p	13.11
75	hsa-let-7g-5p	12.99
76	hsa-miR-452-5p	11.9
77	hsa-miR-486-3p	11.78
78	hsa-miR-15b-5p	11.65
79	hsa-miR-146a-5p	11.53
80	hsa-miR-101-3p	11.41
81	hsa-miR-23a-3p	11.29
